# Supplementary material
Source: PubMed Central journal article supplement (PMC7520449)
Supplement: BPH-177-4683-s001.pdf [file BPH-177-4683-s001.pdf]

# The low-expression programming of 11 $\beta$ -HSD2 mediates osteoporosis susceptibility induced by prenatal caffeine exposure in male offspring rats

Hao Xiao<sup>1,†</sup>, Zhixin Wu<sup>1,†</sup>, Bin Li<sup>1</sup>, Yangfan Shangguan<sup>1</sup>, Jean-François Stoltz<sup>4</sup>, Jacques Magdalou<sup>4</sup>, Liaobin Chen<sup>1,3,\*</sup>, Hui Wang<sup>2,3,\*</sup>

<sup>1</sup> Department of Orthopedic Surgery, Zhongnan Hospital of Wuhan University, Wuhan, 430071, China

<sup>2</sup> Department of Pharmacology, Wuhan University School of Basic Medical Sciences, Wuhan, 430071, China

<sup>3</sup> Hubei Provincial Key Laboratory of Developmentally Originated Disease, Wuhan, 430071, China

<sup>4</sup> UMR 7365 CNRS, University of Lorraine, Nancy 54000, France.

## \*Corresponding authors:

Hui Wang, Ph.D., Department of Pharmacology, Wuhan University School of Basic Medical Sciences, Wuhan, 430071, China. Tel: +86-13908626310; E-mail: wanghui19@whu.edu.cn.

Liaobin Chen, Ph.D., Department of Orthopedic Surgery, Wuhan University Zhongnan Hospital, Wuhan, 430071, China. Tel: +86-13627232557; E-mail: lbchen@whu.edu.cn;

<sup>†</sup>Hao Xiao and Zhixin Wu contributed equally to this work.

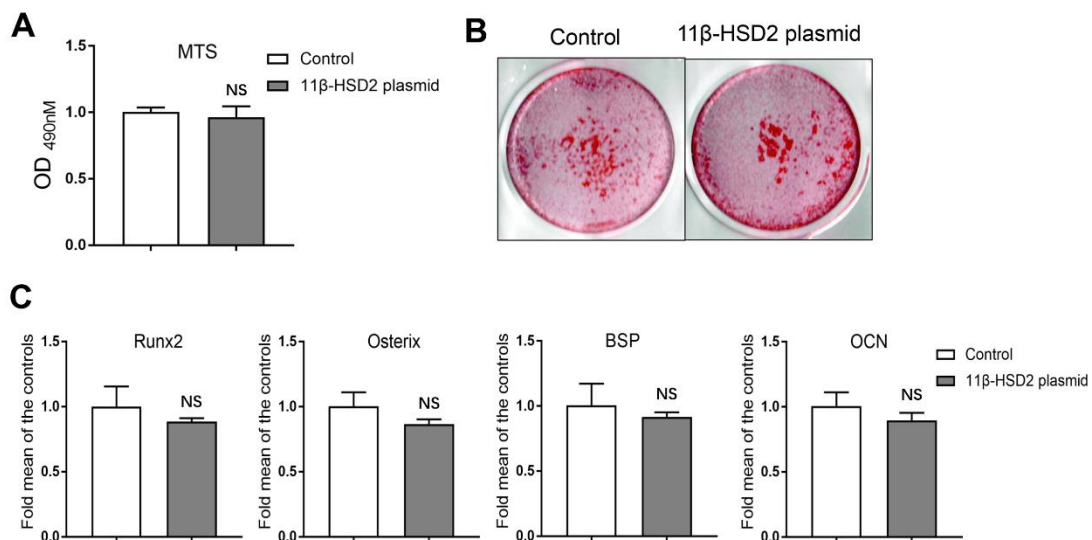

**Figure S1. The effects of manipulation of 11 $\beta$ -HSD2 expression by 11 $\beta$ -HSD2**

**plasmid on preosteoblast cells.** A. MTS assay for cell activity; B. Alizarin red staining for mineralization detection; C. RT-qPCR analysis of gene expression of Runx2, osterix, bone sialoprotein (BSP), osteocalcin (OCN).  $n = 5$  per group, mean  $\pm$  S.E.M., NS, no significance.

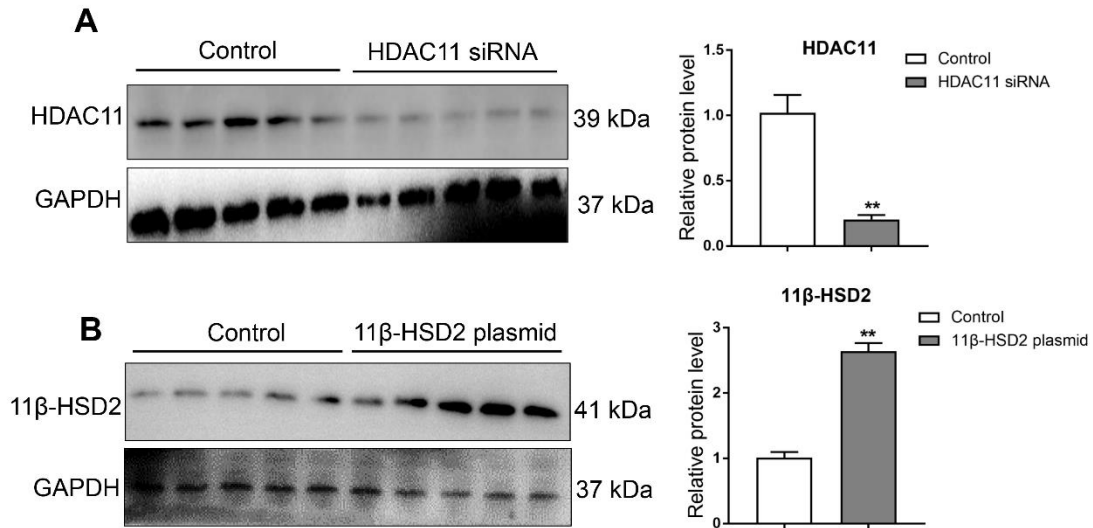

**Figure S2. Western blotting assay of HDAC11 or 11β-HSD2 protein level after treating bone marrow mesenchymal stem cells with HDAC11 siRNA or 11β-HSD2 plasmid.**  $n = 5$  per group, mean  $\pm$  S.E.M., \*\* $P < 0.01$  compared with the control group.

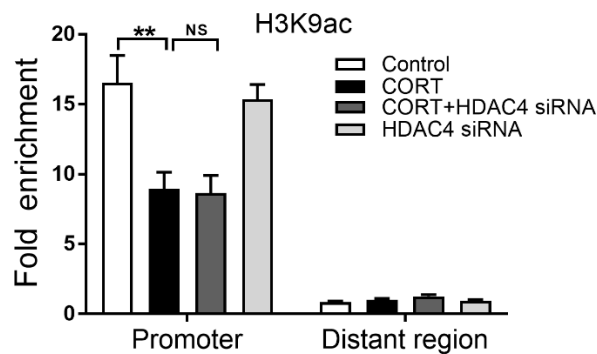

**Figure S3. ChIP assay of the H3K9ac level in 11β-HSD2 promoter region after treating bone marrow mesenchymal stem cells with 500 nM CORT or combined with HDAC4 siRNA.**  $n = 5$  per group, mean  $\pm$  S.E.M., \*\* $P < 0.01$  compared with the control; NS, no significance.

**Table S1. Primers used in quantitative real-time PCR**

| Genes            | Forward primers          | Reverse primers          | Annealing   |
|------------------|--------------------------|--------------------------|-------------|
| Runx2            | TACTTCGTCAGCGTCCTATC     | CAGCGTCAACACCATCATT      | 60 °C, 30 s |
| BSP              | GAGTACAACACTGCGTATGA     | GTAATAATCCTGACCCTCGTAG   | 58 °C, 20 s |
| OCN              | CAGACCTAGCAGACACCATG     | GCTTGGACATGAAGGCTTTG     | 60 °C, 30 s |
| Osterix          | GCACGAGTCACACCGGAAC      | CCAATGTCCAAGGGAGCCAC     | 58 °C, 20 s |
| 11 $\beta$ -HSD2 | CAGGCCTATGGTGAAGACTA     | CAGGTAGTGGTGGATGAAATAC   | 58 °C, 20 s |
| GR               | CCAGGCTTCAGAACTTACA      | CATGCAGGGTAGAGACATTC     | 58 °C, 20 s |
| HDAC1            | GTGGCCCTGGACACAGAGAT     | GCTTGAAATCTGGTCCAAAGT    | 60 °C, 30 s |
| HDAC2            | CAACCTAACTGTCAAAGGTCACGC | TGAAGTCTGGTCCAAAATACTCGA | 62 °C, 30 s |
| HDAC3            | AGGTGGTGGACTTCTATCAG     | CACCAGGAGAGGGATATTGA     | 58 °C, 30 s |
| HDAC4            | CTACATCAGAGACCCAATGC     | GTGACTGTCTCAGCTTCTTC     | 60 °C, 30 s |
| HDAC5            | CCGTGCTCTACATCTCTTTG     | GCTGTCAGGTATTCCACATC     | 58 °C, 30 s |
| HDAC6            | AGGGA ACTACTGGATCTG      | GGCATTGAGGATGGAGAAG      | 60 °C, 30 s |
| HDAC7            | TACAGAACTCTTGAGCCCTT     | CAGGGATTCTTGGGTTTGT      | 60 °C, 30 s |
| HDAC8            | GGCAAGTGTCTGAAGTATGT     | TGGATCTCAGAGGATAGTG      | 60 °C, 30 s |
| HDAC9            | CCCAGCATCCTGTACATTC      | GCTTCAAGGTACTCAACATCTC   | 60 °C, 30 s |
| HDAC10           | CTTACAAGTCCCAGTTTCA      | ATTCTCCTCTGACCTCTATGG    | 60 °C, 30 s |
| HDAC11           | CTTACTTCCCTCCCTCAGTCT    | CCTTCTCAGACCTCCAAATC     | 60 °C, 30 s |
| GAPDH            | GCAAGTTCAACGGCACAG       | GCCAGTAGACTCCACGACA      | 60 °C, 30 s |

BSP, bone sialoprotein; OCN, osteocalcin; 11 $\beta$ -HSD2, 11 $\beta$ -hydroxysteroid

dehydrogenase 2; GR, glucocorticoid receptor; HDAC, histone deacetylase; GAPDH, glyceraldehyde-3-phosphate dehydrogenase.

**Table S2. The offspring's body weight in control and prenatal caffeine exposure (PCE) group**

| Age (week) | Male          |                | Female        |               |
|------------|---------------|----------------|---------------|---------------|
|            | Control       | PCE            | Control       | PCE           |
| 0          | 3.81 ± 0.20   | 3.01 ± 0.18*   | 3.63 ± 0.12   | 3.11 ± 0.17*  |
| 4          | 43.52 ± 3.68  | 33.52 ± 3.05*  | 39.32 ± 2.64  | 32.63 ± 1.79* |
| 8          | 146.55 ± 4.43 | 128.27 ± 3.66* | 132.39 ± 4.12 | 131.94 ± 5.30 |
| 12         | 239.26 ± 5.53 | 219.56 ± 6.13* | 223.52 ± 6.29 | 225.47 ± 5.38 |

Data were shown as mean ± S.E.M., n=8 per group, \* $P < 0.05$  compared with the control group.
